# Supplementary material for: MIMO: an efficient tool for molecular interaction maps overlap
Source: Springer Nature journal article supplement (doi:10.1186/1471-2105-14-159), 2013-05-15
Supplement: 12859_2012_6849_MOESM2_ESM.pdf [file 12859_2012_6849_MOESM2_ESM.pdf]

**Table 1. Reactome biological pathways for functional comparison**

| <b>Id</b> | <b>Pathway Name</b>                                            |
|-----------|----------------------------------------------------------------|
| R75925    | Amyloids                                                       |
| R578      | Apoptosis                                                      |
| R1538     | Cell Cycle Checkpoints                                         |
| R152      | Cell Cycle Mitotic                                             |
| R111155   | Cell-Cell communication                                        |
| R22172    | Chromosome Maintenance                                         |
| R24941    | Circadian Clock                                                |
| R18266    | Axon Guidance                                                  |
| R21303    | Myogenesis                                                     |
| R13698    | Regulation of beta-cell development                            |
| R111057   | Signaling by NODAL                                             |
| R27161    | Transcriptional Regulation of White Adipocyte Differentiation  |
| R15380    | Diabetes pathways                                              |
| R216      | DNA Repair                                                     |
| R383      | DNA Replication                                                |
| R71       | Gene Expression                                                |
| R604      | Hemostasis                                                     |
| R6185     | HIV Infection                                                  |
| R6900     | Immune System                                                  |
| R6167     | Influenza Infection                                            |
| R111183   | Meiosis                                                        |
| R11123    | Membrane Trafficking                                           |
| R12508    | Metabolism of nitric oxide                                     |
| R1698     | Metabolism of nucleotides                                      |
| R111083   | The citric acid (TCA) cycle and respiratory electron transport |
| R21257    | Metabolism of RNA                                              |
| R11193    | Metabolism of vitamins and cofactors                           |
| R13       | Metabolism of amino acids and derivatives                      |
| R1505     | Integration of energy metabolism                               |
| R9431     | Metabolism of porphyrins                                       |
| R13433    | Biological oxidations                                          |
| R474      | Metabolism of carbohydrates                                    |
| R22258    | Metabolism of lipids and lipoproteins                          |
| R17015    | Metabolism of proteins                                         |
| R1675     | mRNA Processing                                                |
| R17044    | Muscle contraction                                             |
| R13685    | Neuronal System                                                |
| R12472    | Regulatory RNA pathways                                        |
| R9417     | Signaling by EGFR                                              |
| R9470     | Signaling by FGFR                                              |
| R498      | Signaling by Insulin receptor                                  |
| R11061    | Signalling by NGF                                              |
| R16888    | Signaling by PDGF                                              |
| R12529    | Signaling by VEGF                                              |
| R111040   | Signaling by SCF-KIT                                           |
| R111064   | DAG and IP3 signaling                                          |
| R75829    | PIP3 activates AKT signaling                                   |
| R634      | RAF-MAP kinase cascade                                         |
| R11044    | Signaling by Rho GTPases                                       |
| R12034    | Signaling by BMP                                               |
| R6844     | Signaling by TGF beta                                          |
| R299      | Signaling by Notch                                             |
| R14797    | Signaling by GPCR                                              |
| R11045    | Signaling by Wnt                                               |
| R13552    | Integrin cell surface interactions                             |
| R1788     | Transcription                                                  |
| R15518    | Transmembrane transport of small molecules                     |

The 56 Reactome biological pathways included in our functional comparison analysis (Version 39, Dec 14, 2011). Full names (**Pathway Name**) were abbreviated into Reactome identifier notation (**Id**).
