# Supplementary material for: MIMO: an efficient tool for molecular interaction maps overlap
Source: Springer Nature journal article supplement (doi:10.1186/1471-2105-14-159), 2013-05-15

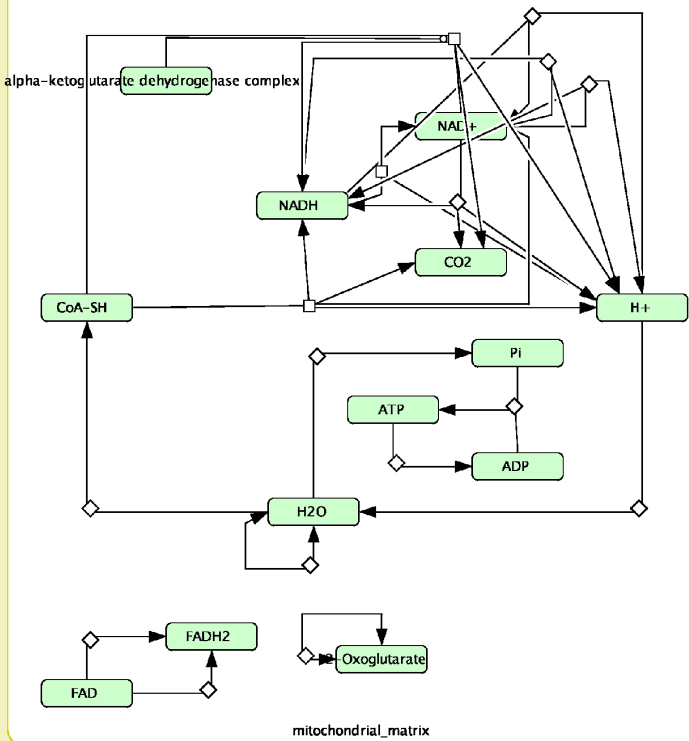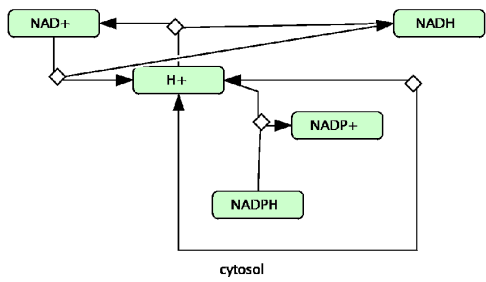

Supplement: 12859_2012_6849_MOESM5_ESM.pdf [file 12859_2012_6849_MOESM5_ESM.pdf]
